1 **Title:** Estimated Monkeypox Susceptible MSM Population in North Carolina

2 **Running Title:** MPX Susceptible Population in NC

3 **Keywords:** Monkeypox, Vaccination, Surveillance, Outbreak,

4 Michael E. DeWitt<sup>1,2</sup>, Mindy M. Sampson<sup>1,2,3</sup>, Robert T. Fairman<sup>2,3,4</sup> Candice J. McNeil<sup>1,2</sup>,

5 Christopher Polk<sup>1,2,3</sup>, Catherine L. Passaretti<sup>2,3</sup>, John W. Sanders<sup>1,2</sup>

6 <sup>1</sup> Section on Infectious Diseases, Department of Internal Medicine, Wake Forest University

7 School of Medicine, Winston-Salem, NC

8 <sup>2</sup> Center for the Study of Microbial Ecology and Emerging Diseases, Wake Forest University

9 School of Medicine, Winston-Salem, NC

10 <sup>3</sup> Division of Infectious Diseases, Atrium Health, Charlotte, NC

11 <sup>4</sup> Department of Health Policy & Behavioral Sciences, School of Public Health, Georgia State

12 University, Atlanta, GA

13

14

15 Corresponding Author:

16 Michael DeWitt

17 Section on Infectious Diseases

18 Wake Forest University School of Medicine

19 Medical Center Boulevard

20 Winston-Salem, NC 27157

21 (336) 716-5393; [medewitt@wakehealth.edu](mailto:medewitt@wakehealth.edu)

22 Updated: 19 July 2022

### 23 **Abstract**

24 Using NHANES survey data we estimate that there are nearly 65,100 North Carolina residents  
25 who identify as men who have sex with men (MSM). Among those men, it is estimated nearly  
26 15,700 have had at least one new sexual partner in the last year and represent the highest risk for  
27 infection and onward transmission of monkeypox. Vaccination strategies should consider  
28 vaccinating with highest priority those who are highly sexually active men who have sex with  
29 men as these sexual networks have the capacity to drive the monkeypox epidemic. Estimates of  
30 the number of MSM by county as well as the estimates of highly sexually active MSM are  
31 provided by North Carolina county in order to inform vaccination quantities and priorities given  
32 the current limited supply of vaccines.

### 33 **Introduction**

34 In May 2022, reports emerged of growing cases of monkeypox (MPX) in Europe and North  
35 America [1–3]. MPX, a double stranded DNA virus belonging to the *orthopoxvirus* genus, is  
36 endemic in West and Central Africa[4–7]. MPX is known to have several animal reservoirs  
37 which include monkeys and prairie dogs[8–10] however the landscape of potential animal  
38 reservoirs is incomplete[11,12]. Typical animal-to-human spillovers occurred through direct  
39 contact with blood, bodily fluids, or mucosal lesions on infected animals[10]. Human-to-human

40 transmission is thought to occur from close contact with respiratory secretions, respiratory  
41 droplets, skin lesions, or fomites [13–15]. Development and climate change are bringing more  
42 humans into contact with other potential animal reservoirs which could include spillover events  
43 into the rodent population[16,17]. With the cessation of mass smallpox vaccinations, which has  
44 cross protection against MPX[7,18], it is theorized that the proportion of the population  
45 susceptible to MPX infections may have increased [19].

46 Early modeling studies concluded that epidemic growth outside of endemic areas would likely  
47 not be self-sustaining (i.e., basic reproduction number  $R_0 < 1$ ) [9,20–23]. Pooled estimates of  
48 outbreaks indicated a secondary attack rate between 0-11% of unvaccinated individuals with an  
49 average of 8% [24]. The case fatality rate is estimated to be between 3-6% in recent outbreaks  
50 [13]. The incubation period is estimated to be between 7-14 days with an infectious period  
51 beginning with the onset of rash until desquamation of the lesions roughly four weeks  
52 later[24,25].

53 The emergence of sustained human-to-human transmission, specifically in gay, bisexual, and  
54 other men who have sex with men (MSM) has shown the epidemic potential for MPX [3,26].  
55 Furthermore, modeling of MSM sexual networks indicates that a high degree of sexual activity  
56 could continue to drive transmission with limited numbers of introductions[27]. Specifically, due  
57 to the heavy-tailed distribution of sexual partners where a small proportion of MSM have much  
58 larger numbers of sexual partners, the epidemic could grow despite having relatively low  
59 secondary attack rates (10%) [27].

60 Vaccines are available for MPX [28] and studies indicate that those vaccinated against smallpox  
61 have a highly reduced secondary attack rates[29]. The current guidance from the North Carolina  
62 Department of Health is to vaccinate people who are close contacts of confirmed cases (post

63 exposure prophylaxis) and MSM or transgender individuals who have had multiple or  
64 anonymous sex partners in the last 14 days (pre exposure prophylaxis). Approaches such as ring  
65 vaccination wherein close contacts of an identified case are vaccinated could also be a useful  
66 approach for stopping onward transmission[30].

67 In this study we seek to quantify the population of MSM in North Carolina, where as of July 19,  
68 2022, 20 cases have been identified. Additionally, we identify the estimated proportion of those  
69 with more than one sexual partners per year which may facilitate the spread of monkeypox  
70 [31,32].

## 71 **Methods**

72 We utilized the 2015-2016 National Health and Nutrition Examination Survey (NHANES) to  
73 estimate the proportion of the male population in the United States who identify as a man having  
74 sex with men within the past year using the specified complex survey design [33]. This dataset  
75 also contains the reported number of sexual partners in the last year for those aged 18-69 using  
76 the survey item “In the past 12 months, with how many men have you had anal or oral sex?”.  
77 Using the 2020 Bridged Postcensal Population Estimates for North Carolina [34] we estimated  
78 the MSM population as well as the proportion who reported more than one new sexual partner in  
79 the last year.

80 All analysis was conducted in R version 4.1.3 (2022-03-10).

## 81 **Results**

82 Using the NHANES survey data we find that 1.9% (95% confidence interval CI, 0.79% to 3.0%)  
83 of the United States male population identifies as a male who has sex with men. Utilizing the

84 North Carolina male population, we further estimate that there are 65,100 (95% CI, 57,800 to  
85 72,400) men in North Carolina who identify as MSM (Table 1, Figure 1). Of those men, we  
86 estimate that 15,700 had more than one new sexual partner in the last year (Table 1). Sexual  
87 partners amongst the MSM respondents shows a strong right-skew (heavy tailed) distribution  
88 with a small number of respondents indicating many sexual partners (Figure 2).

89

90

91

92 *Table 1: Estimated MSM Population by North Carolina County*

| County     | Male Population (18-69 Years Old) | Estimate MSM Population (95% CI) <sup>1</sup> | Estimated MSM Population with ≥1 Sexual Partners in Last Year |
|------------|-----------------------------------|-----------------------------------------------|---------------------------------------------------------------|
| Alamance   | 53,534                            | 1,010 (424 - 1,596)                           | 243                                                           |
| Alexander  | 12,879                            | 243 (101 - 385)                               | 59                                                            |
| Alleghany  | 3,565                             | 67 (27 - 107)                                 | 16                                                            |
| Anson      | 8,389                             | 158 (66 - 250)                                | 38                                                            |
| Ashe       | 8,723                             | 165 (69 - 261)                                | 40                                                            |
| Avery      | 6,909                             | 130 (54 - 206)                                | 31                                                            |
| Beaufort   | 14,237                            | 268 (112 - 424)                               | 65                                                            |
| Bertie     | 6,575                             | 124 (52 - 196)                                | 30                                                            |
| Bladen     | 10,013                            | 189 (79 - 299)                                | 46                                                            |
| Brunswick  | 44,604                            | 841 (351 - 1,331)                             | 203                                                           |
| Buncombe   | 85,752                            | 1,617 (677 - 2,557)                           | 390                                                           |
| Burke      | 30,842                            | 582 (244 - 920)                               | 140                                                           |
| Cabarrus   | 70,551                            | 1,330 (556 - 2,104)                           | 321                                                           |
| Caldwell   | 27,144                            | 512 (214 - 810)                               | 123                                                           |
| Camden     | 3,684                             | 69 (29 - 109)                                 | 17                                                            |
| Carteret   | 22,175                            | 418 (174 - 662)                               | 101                                                           |
| Caswell    | 7,743                             | 146 (62 - 230)                                | 35                                                            |
| Catawba    | 51,700                            | 975 (409 - 1,541)                             | 235                                                           |
| Chatham    | 22,891                            | 432 (182 - 682)                               | 104                                                           |
| Cherokee   | 8,837                             | 167 (71 - 263)                                | 40                                                            |
| Chowan     | 4,172                             | 79 (33 - 125)                                 | 19                                                            |
| Clay       | 3,404                             | 64 (26 - 102)                                 | 15                                                            |
| Cleveland  | 31,077                            | 586 (246 - 926)                               | 141                                                           |
| Columbus   | 17,952                            | 339 (143 - 535)                               | 82                                                            |
| Craven     | 33,474                            | 631 (263 - 999)                               | 152                                                           |
| Cumberland | 112,449                           | 2,121 (889 - 3,353)                           | 511                                                           |
| Currituck  | 9,767                             | 184 (76 - 292)                                | 44                                                            |
| Dare       | 12,300                            | 232 (98 - 366)                                | 56                                                            |
| Davidson   | 54,425                            | 1,026 (430 - 1,622)                           | 247                                                           |
| Davie      | 13,543                            | 255 (107 - 403)                               | 62                                                            |

| County      | Male Population (18-69 Years Old) | Estimate MSM Population (95% CI) <sup>1</sup> | Estimated MSM Population with ≥1 Sexual Partners in Last Year |
|-------------|-----------------------------------|-----------------------------------------------|---------------------------------------------------------------|
| Duplin      | 18,116                            | 342 (144 - 540)                               | 82                                                            |
| Durham      | 109,960                           | 2,074 (868 - 3,280)                           | 500                                                           |
| Edgecombe   | 14,699                            | 277 (115 - 439)                               | 67                                                            |
| Forsyth     | 119,366                           | 2,251 (943 - 3,559)                           | 543                                                           |
| Franklin    | 24,117                            | 455 (191 - 719)                               | 110                                                           |
| Gaston      | 72,909                            | 1,375 (575 - 2,175)                           | 331                                                           |
| Gates       | 3,687                             | 70 (30 - 110)                                 | 17                                                            |
| Graham      | 2,623                             | 49 (21 - 77)                                  | 12                                                            |
| Granville   | 21,037                            | 397 (167 - 627)                               | 96                                                            |
| Greene      | 8,223                             | 155 (65 - 245)                                | 37                                                            |
| Guilford    | 170,754                           | 3,220 (1,348 - 5,092)                         | 776                                                           |
| Halifax     | 15,234                            | 287 (119 - 455)                               | 69                                                            |
| Harnett     | 44,835                            | 846 (354 - 1,338)                             | 204                                                           |
| Haywood     | 19,536                            | 368 (154 - 582)                               | 89                                                            |
| Henderson   | 35,659                            | 672 (282 - 1,062)                             | 162                                                           |
| Hertford    | 7,917                             | 149 (63 - 235)                                | 36                                                            |
| Hoke        | 18,261                            | 344 (144 - 544)                               | 83                                                            |
| Hyde        | 1,911                             | 36 (16 - 56)                                  | 9                                                             |
| Iredell     | 61,198                            | 1,154 (484 - 1,824)                           | 278                                                           |
| Jackson     | 15,089                            | 285 (119 - 451)                               | 69                                                            |
| Johnston    | 69,817                            | 1,317 (551 - 2,083)                           | 317                                                           |
| Jones       | 3,012                             | 57 (23 - 91)                                  | 14                                                            |
| Lee         | 19,780                            | 373 (157 - 589)                               | 90                                                            |
| Lenoir      | 16,876                            | 318 (132 - 504)                               | 77                                                            |
| Lincoln     | 29,265                            | 552 (232 - 872)                               | 133                                                           |
| McDowell    | 15,217                            | 287 (121 - 453)                               | 69                                                            |
| Macon       | 10,643                            | 201 (85 - 317)                                | 48                                                            |
| Madison     | 7,238                             | 136 (56 - 216)                                | 33                                                            |
| Martin      | 6,591                             | 124 (52 - 196)                                | 30                                                            |
| Mecklenburg | 375,767                           | 7,086 (2,966 - 11,206)                        | 1,708                                                         |
| Mitchell    | 4,729                             | 89 (37 - 141)                                 | 21                                                            |
| Montgomery  | 8,512                             | 161 (67 - 255)                                | 39                                                            |

| County       | Male Population (18-69 Years Old) | Estimate MSM Population (95% CI) <sup>1</sup> | Estimated MSM Population with ≥1 Sexual Partners in Last Year |
|--------------|-----------------------------------|-----------------------------------------------|---------------------------------------------------------------|
| Moore        | 30,499                            | 575 (241 - 909)                               | 139                                                           |
| Nash         | 29,907                            | 564 (236 - 892)                               | 136                                                           |
| New Hanover  | 77,666                            | 1,465 (613 - 2,317)                           | 353                                                           |
| Northampton  | 5,861                             | 111 (47 - 175)                                | 27                                                            |
| Onslow       | 83,184                            | 1,569 (657 - 2,481)                           | 378                                                           |
| Orange       | 49,709                            | 937 (391 - 1,483)                             | 226                                                           |
| Pamlico      | 4,231                             | 80 (34 - 126)                                 | 19                                                            |
| Pasquotank   | 13,050                            | 246 (102 - 390)                               | 59                                                            |
| Pender       | 21,244                            | 401 (169 - 633)                               | 97                                                            |
| Perquimans   | 4,018                             | 76 (32 - 120)                                 | 18                                                            |
| Person       | 12,817                            | 242 (102 - 382)                               | 58                                                            |
| Pitt         | 58,886                            | 1,110 (464 - 1,756)                           | 268                                                           |
| Polk         | 6,210                             | 117 (49 - 185)                                | 28                                                            |
| Randolph     | 47,097                            | 888 (372 - 1,404)                             | 214                                                           |
| Richmond     | 13,906                            | 262 (110 - 414)                               | 63                                                            |
| Robeson      | 40,345                            | 761 (319 - 1,203)                             | 183                                                           |
| Rockingham   | 29,058                            | 548 (230 - 866)                               | 132                                                           |
| Rowan        | 46,521                            | 877 (367 - 1,387)                             | 211                                                           |
| Rutherford   | 21,046                            | 397 (167 - 627)                               | 96                                                            |
| Sampson      | 19,924                            | 376 (158 - 594)                               | 91                                                            |
| Scotland     | 11,225                            | 212 (88 - 336)                                | 51                                                            |
| Stanly       | 20,784                            | 392 (164 - 620)                               | 94                                                            |
| Stokes       | 14,959                            | 282 (118 - 446)                               | 68                                                            |
| Surry        | 22,779                            | 430 (180 - 680)                               | 104                                                           |
| Swain        | 4,313                             | 81 (33 - 129)                                 | 20                                                            |
| Transylvania | 10,385                            | 196 (82 - 310)                                | 47                                                            |
| Tyrrell      | 1,415                             | 27 (11 - 43)                                  | 6                                                             |
| Union        | 78,593                            | 1,482 (620 - 2,344)                           | 357                                                           |
| Vance        | 13,108                            | 247 (103 - 391)                               | 60                                                            |
| Wake         | 377,367                           | 7,116 (2,978 - 11,254)                        | 1,715                                                         |
| Warren       | 6,352                             | 120 (50 - 190)                                | 29                                                            |
| Washington   | 3,373                             | 64 (28 - 100)                                 | 15                                                            |



| County  | Male Population (18-69 Years Old) | Estimate MSM Population (95% CI) <sup>1</sup> | Estimated MSM Population with ≥1 Sexual Partners in Last Year |
|---------|-----------------------------------|-----------------------------------------------|---------------------------------------------------------------|
| Watauga | 21,549                            | 406 (170 - 642)                               | 98                                                            |
| Wayne   | 39,672                            | 748 (314 - 1,182)                             | 180                                                           |
| Wilkes  | 21,779                            | 411 (173 - 649)                               | 99                                                            |
| Wilson  | 24,936                            | 470 (196 - 744)                               | 113                                                           |
| Yadkin  | 12,241                            | 231 (97 - 365)                                | 56                                                            |
| Yancey  | 5,667                             | 107 (45 - 169)                                | 26                                                            |

Abbreviations: MSM = men who have sex with men

<sup>1</sup>95% Confidence Interval

93

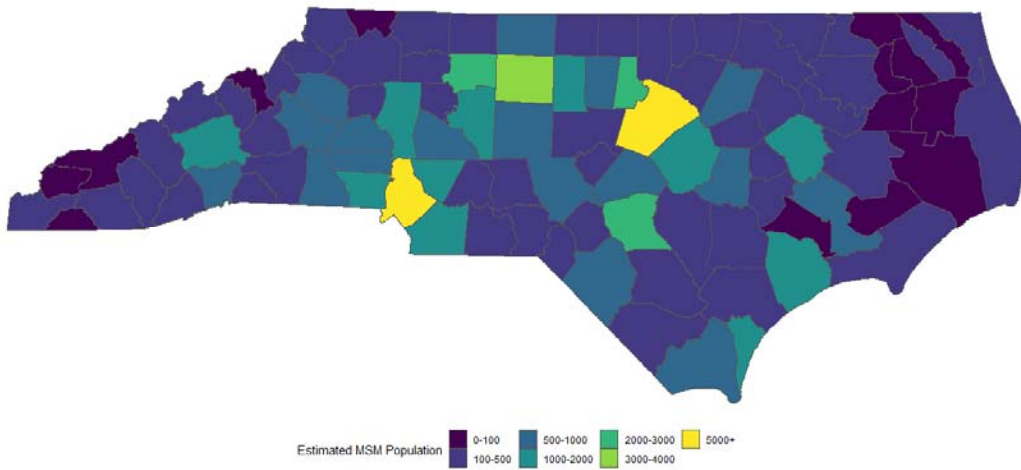

94

95 *Figure 1: Estimated Total MSM Population by County*

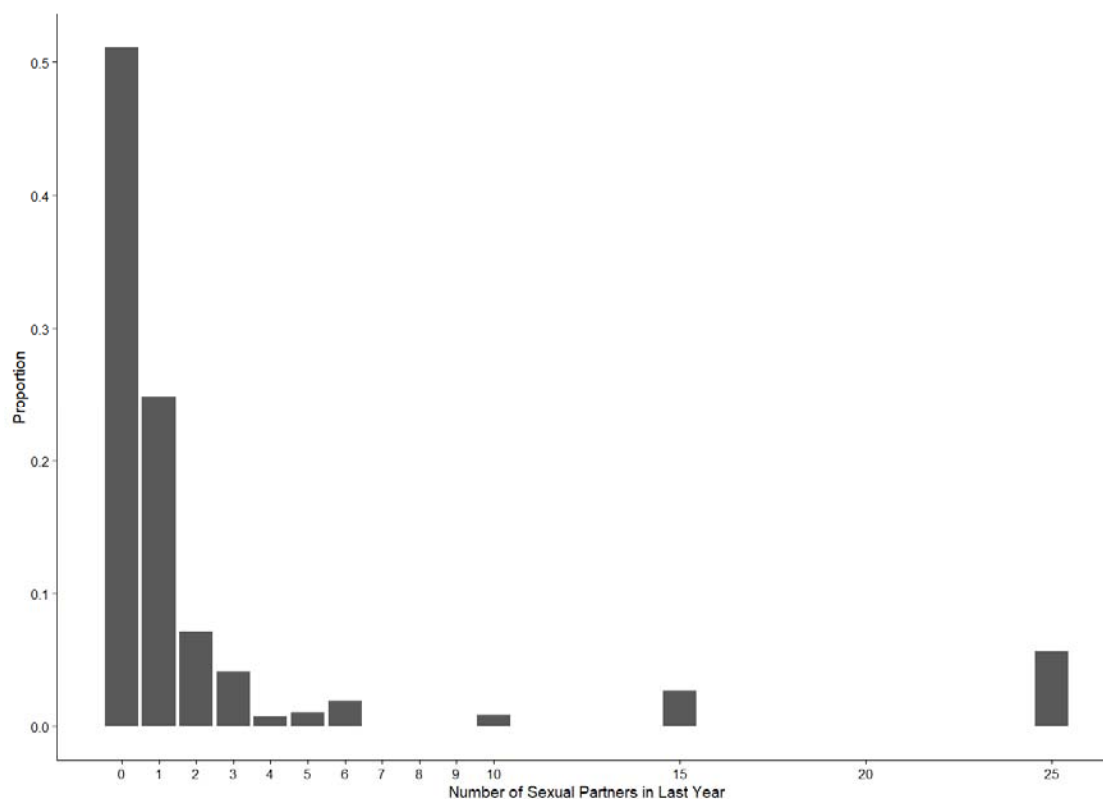

96

97 *Figure 2: Distribution of the Reported Number of Male Sexual Partners in the Last Year Among*  
98 *MSM Respondents in NHANES*

## 99 **Discussion**

100 These findings suggest that at a minimum roughly 15,700 sexually active MSM in North  
101 Carolina should be offered vaccines to reduce the risk of monkeypox infection and to blunt  
102 transmission chains, which is unfortunately far greater than the current vaccine supply in North  
103 Carolina. Additionally, about 49,400 vaccines should be offered to other members of the MSM  
104 community in North Carolina to reduce their risk of infection. These estimates do not include  
105 other occupations where there is a high risk for monkeypox exposure including laboratory  
106 personnel and front-line healthcare workers with dedicated public health response roles where  
107 exposure could rapidly increase with increasing prevalence.

108 Outreach to those at highest risk, in this case MSM with more than one sexual partner in the last  
109 year, should be of the utmost importance. These men are at the highest risk of infection as well  
110 as could become index cases in large transmission chains. Prior work in the ongoing HIV  
111 epidemic has shown that specific outreach to those engaging in high risk activities is vital in  
112 order to slow the spread of infection[35–39].

113 This study is subject to several limitations. The basis for estimating sexual activity and practice  
114 relies on the accuracy of responses to the NHANES survey. Because of violence and stigma  
115 against MSM[40], respondents may not be inclined to answer questions about sexual practices,  
116 thus these estimates could underestimate the true number of MSM or the number of persons  
117 exposed to monkeypox. The NHANES survey is a national level so inferences at the subnational  
118 level may have much larger error due. These limitations are more likely to underestimate the  
119 eligible population for vaccination, suggesting significant expansion of vaccine supply will be  
120 needed in order to contain the current monkeypox outbreak.

## 121 **References**

122 [1] Epidemiological update: Monkeypox outbreak. European Centre for Disease Prevention  
123 and Control 2022. [https://www.ecdc.europa.eu/en/news-events/epidemiological-update-](https://www.ecdc.europa.eu/en/news-events/epidemiological-update-monkeypox-outbreak)  
124 [monkeypox-outbreak](https://www.ecdc.europa.eu/en/news-events/epidemiological-update-monkeypox-outbreak) (accessed July 19, 2022).

125 [2] De Baetselier I, Van Dijck C, Kenyon C, Coppens J, Van den Bossche D, Smet H, et al.  
126 Asymptomatic Monkeypox Virus Infections Among Male Sexual Health Clinic Attendees  
127 in Belgium. SSRN Journal 2022. <https://doi.org/10.2139/ssrn.4142074>.

128 [3] Girometti N, Byrne R, Bracchi M, Heskin J, McOwan A, Tittle V, et al. Demographic and  
129 clinical characteristics of confirmed human monkeypox virus cases in individuals attending

- 130 a sexual health centre in London, UK: an observational analysis. *The Lancet Infectious*  
131 *Diseases* 2022. [https://doi.org/10.1016/S1473-3099\(22\)00411-X](https://doi.org/10.1016/S1473-3099(22)00411-X).
- 132 [4] Haider N, Guitian J, Simons D, Asogun D, Ansumana R, Honeyborne I, et al. Increased  
133 outbreaks of monkeypox highlight gaps in actual disease burden in Sub-Saharan Africa and  
134 in animal reservoirs. *International Journal of Infectious Diseases* 2022;122:107–11.  
135 <https://doi.org/10.1016/j.ijid.2022.05.058>.
- 136 [5] Petersen BW, Kabamba J, McCollum AM, Lushima RS, Wemakoy EO, Tamfum J-JM, et  
137 al. Vaccinating against monkeypox in the Democratic Republic of the Congo. *Antiviral Res*  
138 2019;162:171–7. <https://doi.org/10.1016/j.antiviral.2018.11.004>.
- 139 [6] Arita I, Jezek Z, Ruti K, Khodakevich L. Human Monkeypox: A Newly Emerged  
140 Orthopoxvirus Zoonosis in the Tropical Rain Forests of Africa. *The American Journal of*  
141 *Tropical Medicine and Hygiene* 1985;34:781–9. <https://doi.org/10.4269/ajtmh.1985.34.781>.
- 142 [7] Whitehouse ER, Bonwitt J, Hughes CM, Lushima RS, Likafi T, Nguete B, et al. Clinical  
143 and Epidemiological Findings from Enhanced Monkeypox Surveillance in Tshuapa  
144 Province, Democratic Republic of the Congo During 2011-2015. *J Infect Dis*  
145 2021;223:1870–8. <https://doi.org/10.1093/infdis/jiab133>.
- 146 [8] Reed KD, Melski JW, Graham MB, Regnery RL, Sotir MJ, Wegner MV, et al. The  
147 Detection of Monkeypox in Humans in the Western Hemisphere. *New England Journal of*  
148 *Medicine* 2004;350:342–50. <https://doi.org/10.1056/NEJMoa032299>.
- 149 [9] Jezek Z, Marennikova SS, Mutumbo M, Nakano JH, Paluku KM, Szczeniowski M. Human  
150 Monkeypox: A Study of 2,510 Contacts of 214 Patients. *The Journal of Infectious Diseases*  
151 1986;154:551–5.

- 152 [10] Hutson CL, Carroll DS, Gallardo-Romero N, Weiss S, Clemmons C, Hughes CM, et al.  
153 Monkeypox Disease Transmission in an Experimental Setting: Prairie Dog Animal Model.  
154 PLoS One 2011;6:e28295. <https://doi.org/10.1371/journal.pone.0028295>.
- 155 [11] Doty JB, Malekani JM, Kalemba LN, Stanley WT, Monroe BP, Nakazawa YU, et al.  
156 Assessing Monkeypox Virus Prevalence in Small Mammals at the Human–Animal  
157 Interface in the Democratic Republic of the Congo. *Viruses* 2017;9:283.  
158 <https://doi.org/10.3390/v9100283>.
- 159 [12] Silva NIO, de Oliveira JS, Kroon EG, Trindade G de S, Drumond BP. Here, There, and  
160 Everywhere: The Wide Host Range and Geographic Distribution of Zoonotic  
161 Orthopoxviruses. *Viruses* 2020;13:E43. <https://doi.org/10.3390/v13010043>.
- 162 [13] World Health Organization. Monkeypox 2022. [https://www.who.int/news-room/fact-](https://www.who.int/news-room/fact-sheets/detail/monkeypox)  
163 [sheets/detail/monkeypox](https://www.who.int/news-room/fact-sheets/detail/monkeypox) (accessed July 19, 2022).
- 164 [14] CDC. Monkeypox in the U.S. Centers for Disease Control and Prevention 2022.  
165 <https://www.cdc.gov/poxvirus/monkeypox/transmission.html> (accessed July 19, 2022).
- 166 [15] Jezek Z, Grab B, Paluku KM, Szczeniowski MV. Human monkeypox: disease pattern,  
167 incidence and attack rates in a rural area of northern Zaire. *Trop Geogr Med* 1988;40:73–  
168 83.
- 169 [16] Carlson CJ, Albery GF, Merow C, Trisos CH, Zipfel CM, Eskew EA, et al. Climate change  
170 increases cross-species viral transmission risk. *Nature* 2022:1–1.  
171 <https://doi.org/10.1038/s41586-022-04788-w>.
- 172 [17] Rimoin AW, Alfonso VH, Hoff NA, Doshi RH, Mulembakani P, Kisalu NK, et al. Human  
173 Exposure to Wild Animals in the Sankuru Province of the Democratic Republic of the  
174 Congo. *Ecohealth* 2017;14:552–63. <https://doi.org/10.1007/s10393-017-1262-9>.

- 175 [18] Rimoin AW, Mulembakani PM, Johnston SC, Lloyd Smith JO, Kisalu NK, Kinkela TL, et  
176 al. Major increase in human monkeypox incidence 30 years after smallpox vaccination  
177 campaigns cease in the Democratic Republic of Congo. *Proc Natl Acad Sci U S A*  
178 2010;107:16262–7. <https://doi.org/10.1073/pnas.1005769107>.
- 179 [19] Dye C, Kraemer MUG. Investigating the monkeypox outbreak. *BMJ* 2022;377:o1314.  
180 <https://doi.org/10.1136/bmj.o1314>.
- 181 [20] Jezek Z, Grab B, Dixon H. Stochastic model for interhuman spread of monkeypox. *Am J*  
182 *Epidemiol* 1987;126:1082–92. <https://doi.org/10.1093/oxfordjournals.aje.a114747>.
- 183 [21] FINE PEM, JEZEK Z, GRAB B, DIXON H. The Transmission Potential of Monkeypox  
184 Virus in Human Populations. *International Journal of Epidemiology* 1988;17:643–50.  
185 <https://doi.org/10.1093/ije/17.3.643>.
- 186 [22] Jezek Z, Arita I, Mutombo M, Dunn C, Nakano JH, Szczeniowski M. Four generations of  
187 probable person-to-person transmission of human monkeypox. *Am J Epidemiol*  
188 1986;123:1004–12. <https://doi.org/10.1093/oxfordjournals.aje.a114328>.
- 189 [23] Nolen LD, Osadebe L, Katomba J, Likofata J, Mukadi D, Monroe B, et al. Extended  
190 Human-to-Human Transmission during a Monkeypox Outbreak in the Democratic Republic  
191 of the Congo. *Emerg Infect Dis* 2016;22:1014–21. <https://doi.org/10.3201/eid2206.150579>.
- 192 [24] Beer EM, Rao VB. A systematic review of the epidemiology of human monkeypox  
193 outbreaks and implications for outbreak strategy. *PLOS Neglected Tropical Diseases*  
194 2019;13:e0007791. <https://doi.org/10.1371/journal.pntd.0007791>.
- 195 [25] Jezek Z, Grab B, Szczeniowski M, Paluku KM, Mutombo M. Clinico-epidemiological  
196 features of monkeypox patients with an animal or human source of infection. *Bull World*  
197 *Health Organ* 1988;66:459–64.

- 198 [26] Multi-country monkeypox outbreak in non-endemic countries n.d.  
199 <https://www.who.int/emergencies/disease-outbreak-news/item/2022-DON385> (accessed  
200 July 19, 2022).
- 201 [27] Endo A, Murayama H, Abbott S, Ratnayake R, Pearson CAB, Edmunds WJ, et al. Heavy-  
202 tailed sexual contact networks and the epidemiology of monkeypox outbreak in non-  
203 endemic regions, May 2022 2022:2022.06.13.22276353.  
204 <https://doi.org/10.1101/2022.06.13.22276353>.
- 205 [28] Vaccines and immunization for monkeypox: Interim guidance, 14 June 2022 n.d.  
206 <https://www.who.int/publications-detail-redirect/who-mpx-immunization-2022.1> (accessed  
207 July 19, 2022).
- 208 [29] Ježek Z, Grab B, Szczeniowski MV, Paluku KM, Mutombo M. Human monkeypox:  
209 secondary attack rates. *Bull World Health Organ* 1988;66:465–70.
- 210 [30] Kucharski AJ, Eggo RM, Watson C, Camacho A, Funk S, Edmunds WJ. Effectiveness of  
211 Ring Vaccination as Control Strategy for Ebola Virus Disease - Volume 22, Number 1—  
212 January 2016 - *Emerging Infectious Diseases journal* - CDC n.d.  
213 <https://doi.org/10.3201/eid2201.151410>.
- 214 [31] Althaus CL. Ebola superspreading. *The Lancet Infectious Diseases* 2015;15:507–8.  
215 [https://doi.org/10.1016/S1473-3099\(15\)70135-0](https://doi.org/10.1016/S1473-3099(15)70135-0).
- 216 [32] Lloyd-Smith JO, Schreiber SJ, Kopp PE, Getz WM. Superspreading and the effect of  
217 individual variation on disease emergence. *Nature* 2005;438:355–9.  
218 <https://doi.org/10.1038/nature04153>.
- 219 [33] Centers for Disease Control and Prevention (CDC), National Center for Health Statistics  
220 (NCHS). National Health and Nutrition Examination Survey Data 2015-2016. Hyattsville,

- 221 MD: U.S. Department of Health and Human Services, Centers for Disease Control and  
222 Prevention; n.d.
- 223 [34] National Center for Health Statistics. Vintage 2020 postcensal estimates of the resident  
224 population of the United States (April 1, 2010, July 1, 2010-July 1, 2020), by year, county,  
225 single-year of age (0, 1, 2, ..., 85 years and over), bridged race, Hispanic origin, and sex.  
226 Prepared under a collaborative arrangement with the U.S. Census Bureau. 2022.  
227 [https://www.cdc.gov/nchs/nvss/bridged\\_race.htm](https://www.cdc.gov/nchs/nvss/bridged_race.htm) (accessed June 24, 2022).
- 228 [35] Kerr ZY, Pollack LM, Woods WJ, Blair J, Binson D. Use of multiple sex venues and  
229 prevalence of HIV risk behavior: identifying high-risk men who have sex with men. *Arch*  
230 *Sex Behav* 2015;44:443–51. <https://doi.org/10.1007/s10508-014-0352-9>.
- 231 [36] Eames KTD, Keeling MJ. Contact tracing and disease control. *Proceedings of the Royal*  
232 *Society of London Series B: Biological Sciences* 2003;270:2565–71.  
233 <https://doi.org/10.1098/rspb.2003.2554>.
- 234 [37] Eames KTD, Keeling MJ. Modeling dynamic and network heterogeneities in the spread of  
235 sexually transmitted diseases. *Proceedings of the National Academy of Sciences*  
236 2002;99:13330–5. <https://doi.org/10.1073/pnas.202244299>.
- 237 [38] Doherty IA, Padian NS, Marlow C, Aral SO. Determinants and Consequences of Sexual  
238 Networks as They Affect the Spread of Sexually Transmitted Infections. *The Journal of*  
239 *Infectious Diseases* 2005;191:S42–54. <https://doi.org/10.1086/425277>.
- 240 [39] Jenness SM, Goodreau SM, Rosenberg E, Beylerian EN, Hoover KW, Smith DK, et al.  
241 Impact of the Centers for Disease Control’s HIV Preexposure Prophylaxis Guidelines for  
242 Men Who Have Sex With Men in the United States. *The Journal of Infectious Diseases*  
243 2016;214:1800–7. <https://doi.org/10.1093/infdis/jiw223>.



244 [40] Stigma and Discrimination Affects Gay and Bisexual Men’s Health | CDC 2019.

245 <https://www.cdc.gov/msmhealth/stigma-and-discrimination.htm> (accessed July 19, 2022).

246 **Contributions**

247 MD, MS, RF, and CP conceived the study with input from JW. MD designed the statistical  
248 analysis plan. MD conducted the statistical analysis with input from JW. All authors had access  
249 to the underlying data. All authors contributed to interpretation of the study results. MD created  
250 the initial draft. All authors contributed to the final draft.

251 **Declaration of interests**

252 All authors have no conflicts of interest to disclose.

253 **Data availability**

254 All analysis will be made available at <https://github.com/wf-id/mpx-at-risk>

255 **Funding statement**

256 This study did not receive any funding

257
